# Supplementary material for: Effects of electrostatic drag on the velocity of hydrogen migration – pre- and post-transition state enthalpy/entropy compensation
Source: Royal Society of Chemistry journal article supplement (doi:10.1039/d0cp05000h), 2020-01-01
Supplement: d0cp05000h1.pdf [file d0cp05000h1.pdf]

*Supporting Information*

**Effects of Electrostatic Drag on the Velocity of Hydrogen Migration – Pre- and Post-Transition State Enthalpy/Entropy Compensation**

*Yang-Yang Xing,<sup>†,‡</sup> Shu-Sen Chen<sup>‡</sup>, De-Zhan Chen<sup>†</sup> and Dean J. Tantillo<sup>\*,‡</sup>*

<sup>†</sup>College of Chemistry, Chemical Engineering and Materials Science, Collaborative Innovation Center of Functionalized Probes for Chemical Imaging in Universities of Shandong, Shandong Normal University, Jinan 250014, P. R. China

<sup>‡</sup>Department of Chemistry, University of California, Davis, California 95616, United States

ESI<sup>†</sup>

\*E-mails: djtantillo@ucdavis.edu

|                                                                                      |            |
|--------------------------------------------------------------------------------------|------------|
| <b>1. Molecular Dynamics Simulations</b> .....                                       | <b>S2</b>  |
| <b>2. Energies, Enthalpies, and Free Energies of the Calculated Structures</b> ..... | <b>S2</b>  |
| <b>3. Velocity of hydrogen migration</b> .....                                       | <b>S3</b>  |
| <b>4. Cartesian Coordinates of Optimized Structures</b> .....                        | <b>S4</b>  |
| <b>5. Free energy profiles calculated using the RODS algorithm</b> .....             | <b>S31</b> |
| <b>6. Tunneling results</b> .....                                                    | <b>S31</b> |

## 1. Molecular dynamics simulations

### Molecular Dynamics Trajectory Configuration File (used for all TSSs).

```
method b3lyp/6-31+g(d,p)
method2 restricted
charge 1
multiplicity1
processors 16
memory 50GB
killcheck 1
diagnostics 0
title hydrogen migration dynamics
initialdis 2
timestep 1E-15
scaling 1.0
temperature 298.15
method 3 empiricaldispersion=gd3bj*
numimag 1
searchdir positive
classical 0
keepevery 1
highlevel 999
boxon 0
boxsize 7.5
etolerance 1.0
damping 1
reversetrajectory true
```

\*used for B3LYP-D3(BJ) only. For M06-2X, this line is not present.

## 2. Energies, Enthalpies, and Free Energies of the Calculated Structures

**Zero-point correction (ZPE), thermal correction to enthalpy ( $\Delta H$ ), thermal correction to Gibbs free energy ( $G$ ), energies ( $E$ ), enthalpies ( $H$ ), Gibbs free energies ( $G$ ) (in Hartree) and imaginary frequencies of the transition states calculated at the B3LYP/6-31+G(d,p)**

| Structures                              | ZPE      | TCH      | TCG      | E           | H           | G           | Imaginary Frequency |
|-----------------------------------------|----------|----------|----------|-------------|-------------|-------------|---------------------|
| <b>Reactant</b>                         | 0.520867 | 0.546241 | 0.466743 | -950.908919 | -950.907975 | -950.987473 |                     |
| <b>TS-N(CH<sub>3</sub>)<sub>2</sub></b> | 0.518006 | 0.543364 | 0.464832 | -950.867736 | -950.866792 | -950.945324 | -497.87i            |
| <b>Reactant</b>                         | 0.480698 | 0.503986 | 0.429509 | -931.500819 | -931.499875 | -931.574352 |                     |
| <b>TS-OCH<sub>3</sub></b>               | 0.477426 | 0.500950 | 0.426587 | -931.458299 | -931.457354 | -931.531718 | -463.96i            |
| <b>Reactant</b>                         | 0.448087 | 0.469012 | 0.399742 | -817.005499 | -817.004555 | -817.073825 |                     |
| <b>TS-H</b>                             | 0.444953 | 0.465878 | 0.397357 | -816.962262 | -816.961317 | -817.029838 | -460.85i            |

|                            |          |          |          |              |              |              |          |
|----------------------------|----------|----------|----------|--------------|--------------|--------------|----------|
| <b>Reactant</b>            | 0.452731 | 0.477434 | 0.397527 | -1154.058851 | -1154.057907 | -1154.137814 |          |
| <b>TS-CF<sub>3</sub></b>   | 0.449503 | 0.474083 | 0.395693 | -1154.007050 | -1154.006106 | -1154.084495 | -450.86i |
| <b>Reactant</b>            | 0.447083 | 0.469882 | 0.396230 | -909.250435  | -909.249491  | -909.323143  |          |
| <b>TS-CN</b>               | 0.443296 | 0.466162 | 0.392439 | -909.197963  | -909.197019  | -909.270742  | -450.00i |
| <b>Reactant</b>            | 0.450080 | 0.473732 | 0.396389 | -1021.504128 | -1021.503184 | -1021.580527 |          |
| <b>TS-NO<sub>2</sub></b>   | 0.447522 | 0.470952 | 0.396079 | -1021.457307 | -1021.456363 | -1021.531236 | -431.16i |
| <b>TS<sub>CHO</sub></b>    | 0.372903 | 0.391194 | 0.329238 | -699.297586  | -699.296642  | -699.358598  | -340.63i |
| <b>TS<sub>NO2</sub></b>    | 0.367268 | 0.386030 | 0.322638 | -790.481289  | -790.480344  | -790.543736  | -345.43i |
| <b>TS<sub>CN</sub></b>     | 0.362732 | 0.380803 | 0.319439 | -678.220960  | -678.220016  | -678.281380  | -347.27i |
| <b>TS<sub>OCH3</sub></b>   | 0.396527 | 0.415622 | 0.351973 | -700.498568  | -700.497624  | -700.561273  | -371.32i |
| <b>TS<sub>F</sub></b>      | 0.356531 | 0.373849 | 0.313976 | -685.227600  | -685.226656  | -685.286528  | -391.91i |
| <b>TS<sub>SCH3</sub></b>   | 0.392377 | 0.412190 | 0.346176 | -1023.456973 | -1023.456029 | -1023.522043 | -393.15i |
| <b>TS<sub>CH=CH2</sub></b> | 0.396852 | 0.415592 | 0.352523 | -663.345003  | -663.344059  | -663.407128  | -427.26i |
| <b>TS<sub>NO</sub></b>     | 0.360459 | 0.378792 | 0.316443 | -715.264195  | -715.263251  | -715.325600  | -428.57i |
| <b>TS<sub>H</sub></b>      | 0.363293 | 0.379866 | 0.322053 | -585.980904  | -585.979960  | -586.037773  | -465.44i |
| <b>TS<sub>NMe2</sub></b>   | 0.437308 | 0.457600 | 0.391900 | -719.881684  | -719.880740  | -719.946440  | -348.46i |
| <b>TS<sub>Furan</sub></b>  | 0.414336 | 0.434560 | 0.367515 | -814.789644  | -814.788700  | -814.855745  | -446.96i |

### 3. Velocity of hydrogen migration

The velocity effects were measured in two ways: (1) distances between starting and ending positions of the migrating hydrogen divided by total trajectory time, (2) total distance traversed by the migrating hydrogen during a trajectory divided by total trajectory time (since the migrating hydrogen does not necessarily take a direct path and can move back and forth). We refer to the former as “velocity<sub>endpoints</sub>” and the latter as “velocity<sub>allpoints</sub>.”

Table S1. Results of the average velocity<sub>endpoints</sub> and average velocity<sub>allpoints</sub> for hydrogen migration in Figure 1.

| X                                | TSS                                     | Average<br>velocity <sub>endpoints</sub><br>(Å/ps) | Average<br>velocity <sub>allpoints</sub><br>(Å/ps) | Total<br>trajectories |
|----------------------------------|-----------------------------------------|----------------------------------------------------|----------------------------------------------------|-----------------------|
| N(CH <sub>3</sub> ) <sub>2</sub> | <b>TS-N(CH<sub>3</sub>)<sub>2</sub></b> | 22.5                                               | 48.5                                               | 104                   |
| OCH <sub>3</sub>                 | <b>TS-OCH<sub>3</sub></b>               | 20.6                                               | 48.9                                               | 122                   |
| H                                | <b>TS-H</b>                             | 20.2                                               | 47.4                                               | 117                   |
| CF <sub>3</sub>                  | <b>TS-CF<sub>3</sub></b>                | 20.7                                               | 48.8                                               | 143                   |
| CN                               | <b>TS-CN</b>                            | 19.9                                               | 49.0                                               | 131                   |
| NO <sub>2</sub>                  | <b>TS-NO<sub>2</sub></b>                | 20.9                                               | 49.4                                               | 109                   |

Table S2. Results of the average velocity<sub>endpoints</sub> and average velocity<sub>allpoints</sub> for hydrogen migration in Figure 4.

| X                  | TSS                  | Average<br>velocity <sub>endpoints</sub><br>(Å/ps) | Average<br>velocity <sub>allpoints</sub><br>(Å/ps) | Total<br>trajectories |
|--------------------|----------------------|----------------------------------------------------|----------------------------------------------------|-----------------------|
| CHO                | TS <sub>CHO</sub>    | 17.3                                               | 47.4                                               | 86                    |
| NO <sub>2</sub>    | TS <sub>NO2</sub>    | 17.0                                               | 48.0                                               | 85                    |
| CN                 | TS <sub>CN</sub>     | 14.4                                               | 46.6                                               | 74                    |
| OCH <sub>3</sub>   | TS <sub>OCH3</sub>   | 16.5                                               | 46.8                                               | 92                    |
| F                  | TS <sub>F</sub>      | 18.5                                               | 48.9                                               | 89                    |
| SCH <sub>3</sub>   | TS <sub>SCH3</sub>   | 16.2                                               | 45.3                                               | 82                    |
| CH=CH <sub>2</sub> | TS <sub>CH=CH2</sub> | 20.4                                               | 48.5                                               | 119                   |
| NO                 | TS <sub>NO</sub>     | 21.0                                               | 48.4                                               | 111                   |
| H                  | TS <sub>H</sub>      | 21.4                                               | 48.6                                               | 105                   |
| NMe <sub>2</sub>   | TS <sub>NMe2</sub>   | 24.3                                               | 56.3                                               | 93                    |
| Furan              | TS <sub>Furan</sub>  | 20.6                                               | 48.4                                               | 90                    |

#### 4. Cartesian Coordinates of Optimized Structures

##### Reactant

|   |             |             |             |
|---|-------------|-------------|-------------|
| C | -1.10223400 | 0.19560800  | 0.93352300  |
| H | -0.02492700 | 0.02713300  | 0.88070000  |
| C | -1.65728500 | -0.86631500 | 1.99653400  |
| H | -2.66247800 | -0.53033000 | 2.27283300  |
| H | -1.01328000 | -0.89345500 | 2.87709800  |
| C | -1.72618900 | -2.12759300 | 1.26829000  |
| C | -0.71918600 | -3.18459000 | 1.46148500  |
| H | -0.50235400 | -3.34002600 | 2.52381800  |
| H | -0.97641000 | -4.12287200 | 0.96717800  |
| H | 0.22761900  | -2.81960700 | 1.02031900  |
| C | -2.73441200 | -2.18287600 | 0.21357000  |
| H | -3.66660900 | -2.52828000 | 0.69486300  |
| C | -2.50694600 | -2.90303400 | -1.14539000 |
| H | -3.01980900 | -3.85654500 | -1.28299200 |
| H | -1.44860400 | -3.03742600 | -1.38389300 |
| C | -3.13717300 | -1.66342800 | -1.84300500 |
| H | -4.18092600 | -1.83733800 | -2.11852700 |
| H | -2.60155900 | -1.27901500 | -2.71492400 |
| C | -3.01770700 | -0.80860700 | -0.53907100 |
| C | -1.70040300 | 0.02561100  | -0.49391500 |
| H | -0.97059000 | -0.54539700 | -1.08202000 |
| C | -4.29337700 | -0.06766400 | -0.13559700 |

|   |             |             |             |
|---|-------------|-------------|-------------|
| H | -4.19452500 | 0.47363900  | 0.81074000  |
| H | -4.57759200 | 0.66064600  | -0.90040400 |
| H | -5.13036500 | -0.76660000 | -0.03751700 |
| C | -1.78248900 | 1.47217300  | -1.06027600 |
| H | -1.21620500 | 1.56145100  | -1.99118600 |
| H | -2.81413400 | 1.73388600  | -1.30793200 |
| C | -1.24415200 | 2.46439300  | 0.02434200  |
| C | 0.22503100  | 2.91994400  | -0.26201200 |
| H | 0.21810200  | 3.41647900  | -1.24076200 |
| H | 0.46968300  | 3.69796600  | 0.47118300  |
| C | -1.35852500 | 1.65264400  | 1.34609200  |
| H | -0.66075800 | 1.99713400  | 2.11587300  |
| C | -2.11450400 | 3.73299300  | 0.08712300  |
| H | -2.05979100 | 4.29245200  | -0.85322800 |
| H | -3.16620800 | 3.48476300  | 0.26723400  |
| H | -1.78469300 | 4.40185000  | 0.88949600  |
| H | -2.37160900 | 1.76163000  | 1.75277300  |
| C | 1.32916600  | 1.88386200  | -0.24181300 |
| C | 1.65738600  | 1.11245000  | -1.36937900 |
| C | 2.12018700  | 1.68474400  | 0.90261000  |
| C | 2.68289700  | 0.17033800  | -1.35411200 |
| H | 1.12032300  | 1.26878900  | -2.30189600 |
| C | 3.15132100  | 0.75033800  | 0.94440000  |
| H | 1.94376800  | 2.29492200  | 1.78570000  |
| C | 3.46157900  | -0.04616700 | -0.18777200 |
| H | 2.90272600  | -0.36890700 | -2.26718000 |
| H | 3.73816700  | 0.66851600  | 1.85071700  |
| N | 4.48395200  | -0.97653500 | -0.16076300 |
| C | 4.91490700  | -1.61126100 | -1.40085400 |
| C | 5.39081300  | -1.01698200 | 0.98052800  |
| H | 5.70956700  | -2.32348600 | -1.17839400 |
| H | 4.09314200  | -2.16757600 | -1.86549200 |
| H | 5.29736300  | -0.88510000 | -2.13311200 |
| H | 4.84505400  | -1.21318600 | 1.90996500  |
| H | 6.10368200  | -1.82958800 | 0.84006200  |
| H | 5.95434100  | -0.08027000 | 1.10244400  |

**TS-N(CH<sub>3</sub>)<sub>2</sub>**

|   |             |            |             |
|---|-------------|------------|-------------|
| C | -1.83541700 | 0.30479700 | -0.83534200 |
| H | -0.84617600 | 0.42186900 | -1.28495700 |
| C | -2.68967600 | 1.53150900 | -1.29928100 |
| H | -3.61003500 | 1.60507200 | -0.70949200 |
| H | -2.97316100 | 1.34934000 | -2.34211300 |
| C | -1.78261300 | 2.71313600 | -1.10998000 |

|   |             |             |             |
|---|-------------|-------------|-------------|
| C | -0.79347100 | 3.00738600  | -2.20672200 |
| H | -1.33375600 | 3.40748800  | -3.07399000 |
| H | -0.05331600 | 3.75546900  | -1.91581300 |
| H | -0.26367500 | 2.11239200  | -2.55865700 |
| C | -1.70857500 | 3.17749200  | 0.14574900  |
| H | -2.55057900 | 2.96093800  | 0.80706400  |
| C | -0.41866800 | 3.41997100  | 0.85649400  |
| H | -0.36092300 | 4.34916800  | 1.43625100  |
| H | 0.42672200  | 3.41417000  | 0.16480100  |
| C | -0.31196700 | 2.25381300  | 1.87494300  |
| H | -0.80465300 | 2.59984200  | 2.79333600  |
| H | 0.72994300  | 2.08187000  | 2.17689100  |
| C | -0.95490800 | 0.85176300  | 1.73824500  |
| C | -1.58829000 | 0.09918300  | 0.70099800  |
| H | -0.30902000 | -0.02880300 | 0.89645400  |
| C | -0.91988200 | 0.19565500  | 3.12080600  |
| H | -1.93280500 | 0.18022200  | 3.53903800  |
| H | -0.55421900 | -0.83093600 | 3.09609100  |
| H | -0.28045200 | 0.75915500  | 3.79994500  |
| C | -2.25240300 | -1.23568100 | 1.04547600  |
| H | -1.84697900 | -1.74750500 | 1.91628000  |
| H | -3.29481100 | -0.97570500 | 1.28981800  |
| C | -2.22812200 | -2.10239700 | -0.22957300 |
| C | -0.87524900 | -2.87027900 | -0.38279300 |
| H | -0.92357100 | -3.41336200 | -1.33433500 |
| H | -0.84691700 | -3.63669700 | 0.40173700  |
| C | -2.45390800 | -1.03256100 | -1.31818200 |
| H | -2.04825400 | -1.32444000 | -2.29146000 |
| C | -3.36114800 | -3.14201500 | -0.21512700 |
| H | -3.24072000 | -3.85559300 | 0.60734500  |
| H | -4.34009000 | -2.66263100 | -0.10642500 |
| H | -3.37332500 | -3.71501700 | -1.14813200 |
| H | -3.53243200 | -0.89129000 | -1.45693000 |
| C | 0.41679300  | -2.07907700 | -0.32895100 |
| C | 1.14870800  | -1.94200800 | 0.86399100  |
| C | 0.99064200  | -1.50569700 | -1.47808100 |
| C | 2.34979000  | -1.23396800 | 0.93077000  |
| H | 0.79888300  | -2.44458700 | 1.76412700  |
| C | 2.18831500  | -0.79988400 | -1.44072300 |
| H | 0.50085900  | -1.63558600 | -2.44052700 |
| C | 2.90578200  | -0.62838200 | -0.22610900 |
| H | 2.87805900  | -1.20031500 | 1.87547900  |
| H | 2.58594400  | -0.40978200 | -2.36906100 |
| N | 4.09022900  | 0.07433300  | -0.17937100 |

|   |            |             |             |
|---|------------|-------------|-------------|
| C | 4.90409600 | 0.03922900  | 1.03108900  |
| C | 4.72112500 | 0.51226200  | -1.42069100 |
| H | 5.78081700 | 0.67064700  | 0.88844300  |
| H | 4.35082900 | 0.43385100  | 1.89065600  |
| H | 5.24690200 | -0.97646100 | 1.27622400  |
| H | 4.05433800 | 1.16913300  | -1.98955700 |
| H | 5.61794500 | 1.08326300  | -1.18105000 |
| H | 5.01129100 | -0.33099200 | -2.06392900 |

**Reactant**

|   |             |             |             |
|---|-------------|-------------|-------------|
| C | -1.44602100 | -0.50546400 | -1.04318600 |
| H | -1.20098400 | 0.22357800  | -1.82207500 |
| C | -3.05564400 | -0.72591700 | -1.03972100 |
| H | -3.27666700 | -1.34639700 | -0.16841000 |
| H | -3.36328700 | -1.21705800 | -1.96281800 |
| C | -3.51188000 | 0.64324400  | -0.91962800 |
| C | -3.94304900 | 1.39335500  | -2.12085800 |
| H | -4.85392800 | 1.96226200  | -1.88998900 |
| H | -3.19322500 | 2.15638600  | -2.37579500 |
| H | -4.11052700 | 0.75206200  | -2.98628600 |
| C | -3.33778900 | 1.29324700  | 0.37214800  |
| H | -4.09129200 | 0.86539500  | 1.05267100  |
| C | -3.09075700 | 2.81804300  | 0.42605600  |
| H | -3.49772100 | 3.25745500  | 1.33804800  |
| H | -3.43114400 | 3.41933400  | -0.41869600 |
| C | -1.56800700 | 2.53224800  | 0.52618300  |
| H | -0.98842500 | 3.14981400  | 1.21709200  |
| H | -1.08794000 | 2.56023800  | -0.45838200 |
| C | -1.83672300 | 1.06795100  | 0.99498800  |
| C | -1.00645500 | -0.06513800 | 0.36451400  |
| H | 0.01598700  | 0.32617800  | 0.26348500  |
| C | -1.89168600 | 0.99813100  | 2.52399200  |
| H | -2.34770000 | 0.07228800  | 2.88395600  |
| H | -0.87359200 | 1.05135200  | 2.92444200  |
| H | -2.45175100 | 1.83763700  | 2.94578700  |
| C | -0.91014100 | -1.40544000 | 1.12647900  |
| H | -0.27987300 | -1.32735000 | 2.01507300  |
| H | -1.90059200 | -1.71914000 | 1.48184500  |
| C | -0.36633600 | -2.45131400 | 0.10919200  |
| C | 1.17858600  | -2.67117100 | 0.24773300  |
| H | 1.47390700  | -3.38690600 | -0.52936600 |
| H | 1.34530200  | -3.17824300 | 1.20607400  |
| C | -0.73383700 | -1.85478100 | -1.29407100 |
| H | 0.16331600  | -1.65259600 | -1.88524300 |

|                           |             |             |             |
|---------------------------|-------------|-------------|-------------|
| C                         | -1.04632500 | -3.81742700 | 0.32272900  |
| H                         | -0.85576500 | -4.19745700 | 1.33224600  |
| H                         | -2.13295400 | -3.75049900 | 0.19229200  |
| H                         | -0.67176600 | -4.56192000 | -0.38801800 |
| H                         | -1.34732700 | -2.54394400 | -1.88246600 |
| C                         | 2.08320800  | -1.45734200 | 0.17248400  |
| C                         | 2.42413600  | -0.72765300 | 1.32858400  |
| C                         | 2.64972100  | -1.03459300 | -1.03682600 |
| C                         | 3.25024500  | 0.38891400  | 1.27273500  |
| H                         | 2.05881100  | -1.05655200 | 2.29847400  |
| C                         | 3.48599600  | 0.08585800  | -1.11730600 |
| H                         | 2.46853000  | -1.60538300 | -1.94464000 |
| C                         | 3.78383300  | 0.81155200  | 0.04341000  |
| H                         | 3.52131100  | 0.93380700  | 2.17138200  |
| H                         | 3.91208300  | 0.36176700  | -2.07455100 |
| O                         | 4.58267300  | 1.91202300  | 0.08967300  |
| C                         | 5.23770900  | 2.33830200  | -1.10380800 |
| H                         | 4.51280400  | 2.63645200  | -1.87122100 |
| H                         | 5.83870100  | 3.20152400  | -0.81839400 |
| H                         | 5.89162200  | 1.55211200  | -1.49884600 |
| <b>TS-OCH<sub>3</sub></b> |             |             |             |
| C                         | 1.42530000  | -0.22293200 | -0.99673900 |
| H                         | 0.36488500  | -0.29030900 | -1.25405200 |
| C                         | 2.13856400  | -1.41434100 | -1.71319400 |
| H                         | 3.16516600  | -1.52293200 | -1.34669200 |
| H                         | 2.18735500  | -1.16162200 | -2.77867900 |
| C                         | 1.28713600  | -2.61101900 | -1.40581100 |
| C                         | 0.06413900  | -2.83219800 | -2.25658200 |
| H                         | 0.38067400  | -3.16928500 | -3.25174700 |
| H                         | -0.59602900 | -3.60205200 | -1.85177400 |
| H                         | -0.52327400 | -1.91775600 | -2.41232800 |
| C                         | 1.51109900  | -3.17361200 | -0.20962400 |
| H                         | 2.48819900  | -3.00106900 | 0.24742500  |
| C                         | 0.42776800  | -3.48840800 | 0.76649000  |
| H                         | 0.50728900  | -4.45777700 | 1.27313800  |
| H                         | -0.55971400 | -3.44280600 | 0.30149400  |
| C                         | 0.57530500  | -2.40252500 | 1.86248100  |
| H                         | 1.31106500  | -2.78449400 | 2.58431100  |
| H                         | -0.34755600 | -2.30160300 | 2.45012800  |
| C                         | 1.11639600  | -0.96701100 | 1.67273500  |
| C                         | 1.47080200  | -0.12087500 | 0.57341100  |
| H                         | 0.26114200  | -0.08600500 | 1.01079600  |
| C                         | 1.34112500  | -0.37556900 | 3.06677200  |
| H                         | 2.41410300  | -0.23177700 | 3.23459000  |



|                 |             |             |             |
|-----------------|-------------|-------------|-------------|
| H               | 0.85449700  | 0.59226800  | 3.19894600  |
| H               | 0.96035700  | -1.04383500 | 3.83821900  |
| C               | 2.11806500  | 1.23542600  | 0.87825100  |
| H               | 1.80638700  | 1.69339900  | 1.81556700  |
| H               | 3.19408200  | 1.02186200  | 0.97804800  |
| C               | 1.89138500  | 2.15443000  | -0.34024200 |
| C               | 0.52370700  | 2.90989100  | -0.26529100 |
| H               | 0.44375400  | 3.51358300  | -1.17660500 |
| H               | 0.59195100  | 3.62262200  | 0.56609300  |
| C               | 1.96851600  | 1.13876700  | -1.49646600 |
| H               | 1.43019700  | 1.46919200  | -2.38989200 |
| C               | 3.00184300  | 3.21412000  | -0.44181400 |
| H               | 2.98818400  | 3.89283000  | 0.41789900  |
| H               | 3.99216200  | 2.74861600  | -0.48956700 |
| H               | 2.87609200  | 3.82211400  | -1.34356100 |
| H               | 3.01794400  | 1.01303000  | -1.78949700 |
| C               | -0.74436300 | 2.09532600  | -0.10199700 |
| C               | -1.23681000 | 1.75772400  | 1.17592800  |
| C               | -1.50192200 | 1.67913700  | -1.20527400 |
| C               | -2.39449300 | 1.00018800  | 1.34171500  |
| H               | -0.73481000 | 2.14390800  | 2.06100900  |
| C               | -2.67215100 | 0.92564700  | -1.06355100 |
| H               | -1.18632800 | 1.96087400  | -2.20692400 |
| C               | -3.12088600 | 0.56904900  | 0.21758800  |
| H               | -2.78176100 | 0.77065800  | 2.32944300  |
| H               | -3.23084700 | 0.64293900  | -1.94787300 |
| O               | -4.23585900 | -0.15745100 | 0.47668200  |
| C               | -5.09319700 | -0.52803500 | -0.60661500 |
| H               | -4.57874300 | -1.19357200 | -1.30965400 |
| H               | -5.92876500 | -1.05773400 | -0.15037500 |
| H               | -5.46474900 | 0.35726800  | -1.13436400 |
| <b>Reactant</b> |             |             |             |
| C               | 0.27661500  | 0.17929700  | -0.96883700 |
| H               | -0.52226200 | -0.56218700 | -0.90866300 |
| C               | 1.35252000  | -0.42198900 | -1.99314500 |
| H               | 2.04518000  | 0.38984700  | -2.23631300 |
| H               | 0.85406600  | -0.78577000 | -2.89281300 |
| C               | 2.01651500  | -1.45697000 | -1.21362800 |
| C               | 1.69057200  | -2.88266000 | -1.37947300 |
| H               | 1.56043600  | -3.15009700 | -2.43253500 |
| H               | 2.39898500  | -3.54515700 | -0.87851300 |
| H               | 0.70315200  | -3.04099600 | -0.90659800 |
| C               | 2.87018000  | -0.97061100 | -0.13889100 |
| H               | 3.85885100  | -0.79766800 | -0.60075000 |

|   |             |             |             |
|---|-------------|-------------|-------------|
| C | 3.00337200  | -1.67303500 | 1.24028900  |
| H | 3.92746200  | -2.22563900 | 1.41781400  |
| H | 2.15556900  | -2.32368200 | 1.47061700  |
| C | 2.89194400  | -0.26809000 | 1.89993400  |
| H | 3.86936200  | 0.12243000  | 2.19559200  |
| H | 2.20886100  | -0.19110400 | 2.74971600  |
| C | 2.39173700  | 0.37782800  | 0.56635300  |
| C | 0.83454600  | 0.42541600  | 0.46767600  |
| H | 0.47311700  | -0.39951600 | 1.09350400  |
| C | 3.12543100  | 1.65522300  | 0.15473400  |
| H | 2.77230900  | 2.06779100  | -0.79604900 |
| H | 3.00098300  | 2.43299800  | 0.91360900  |
| H | 4.20087100  | 1.47172900  | 0.06408000  |
| C | 0.15242600  | 1.74303500  | 0.93381000  |
| H | -0.32269900 | 1.62097900  | 1.91109200  |
| H | 0.89275500  | 2.53810600  | 1.05205600  |
| C | -0.87896000 | 2.17694200  | -0.15614800 |
| C | -2.34212400 | 1.72965500  | 0.17636900  |
| H | -2.61570100 | 2.22395900  | 1.11648600  |
| H | -2.99247500 | 2.15894400  | -0.59468500 |
| C | -0.32021500 | 1.51252100  | -1.44663100 |
| H | -1.08125400 | 1.37736900  | -2.22175300 |
| C | -0.90472900 | 3.70961700  | -0.30773400 |
| H | -1.24975000 | 4.18805400  | 0.61535800  |
| H | 0.09192500  | 4.10273300  | -0.53562300 |
| H | -1.58034200 | 4.01864200  | -1.11248300 |
| H | 0.46593700  | 2.15178900  | -1.86736200 |
| C | -2.65449100 | 0.25043800  | 0.29247600  |
| C | -2.46451500 | -0.44688000 | 1.49752900  |
| C | -3.17837500 | -0.45877600 | -0.80200200 |
| C | -2.75117700 | -1.81153900 | 1.59606200  |
| H | -2.11653200 | 0.08752700  | 2.37798300  |
| C | -3.46832000 | -1.82305900 | -0.70982300 |
| H | -3.38281300 | 0.06791500  | -1.73118700 |
| C | -3.24691200 | -2.50758800 | 0.48913700  |
| H | -2.61315400 | -2.32451000 | 2.54371600  |
| H | -3.88895600 | -2.34434600 | -1.56500400 |
| H | -3.49011800 | -3.56279600 | 0.57035400  |

**TS-H**

|   |             |             |             |
|---|-------------|-------------|-------------|
| C | -0.44175200 | -0.99546600 | -0.88541400 |
| H | -0.31532600 | 0.01445100  | -1.28532600 |
| C | -1.74579700 | -1.57156700 | -1.52614500 |
| H | -2.03691300 | -2.50372600 | -1.02981900 |

|   |             |             |             |
|---|-------------|-------------|-------------|
| H | -1.50944100 | -1.80652800 | -2.57033200 |
| C | -2.76763900 | -0.48528700 | -1.35833100 |
| C | -2.77023000 | 0.63064300  | -2.36949900 |
| H | -3.17826600 | 0.25148300  | -3.31497500 |
| H | -3.39443300 | 1.47358200  | -2.06591200 |
| H | -1.76460300 | 1.00784200  | -2.59685900 |
| C | -3.35302900 | -0.44266600 | -0.15314900 |
| H | -3.35435000 | -1.36466600 | 0.43263500  |
| C | -3.46660300 | 0.80024700  | 0.66333300  |
| H | -4.43348600 | 0.96408300  | 1.15419900  |
| H | -3.24445200 | 1.69177400  | 0.07243800  |
| C | -2.42304600 | 0.60888000  | 1.79239400  |
| H | -2.92756300 | 0.05248200  | 2.59517300  |
| H | -2.15860400 | 1.56782300  | 2.25888400  |
| C | -1.10738600 | -0.19777400 | 1.70459100  |
| C | -0.34454400 | -0.84384700 | 0.67882400  |
| H | -0.09284100 | 0.38828600  | 0.95224800  |
| C | -0.55893800 | -0.33316600 | 3.12754800  |
| H | -0.60854600 | -1.38171000 | 3.44084900  |
| H | 0.48083700  | -0.01247900 | 3.21245500  |
| H | -1.14548600 | 0.26075800  | 3.82746000  |
| C | 0.87457800  | -1.67447200 | 1.09740400  |
| H | 1.38606800  | -1.32248500 | 1.99177500  |
| H | 0.47025300  | -2.66965600 | 1.34157300  |
| C | 1.81380800  | -1.79201400 | -0.12139500 |
| C | 2.81424100  | -0.59327100 | -0.21823700 |
| H | 3.41496200  | -0.75232600 | -1.12085300 |
| H | 3.50615100  | -0.67834500 | 0.62862700  |
| C | 0.79626100  | -1.83965200 | -1.27798200 |
| H | 1.21583600  | -1.49685100 | -2.22853800 |
| C | 2.64799100  | -3.08262400 | -0.04699600 |
| H | 3.31934400  | -3.07671800 | 0.81846700  |
| H | 2.00520500  | -3.96610500 | 0.02941400  |
| H | 3.26636700  | -3.19758400 | -0.94308000 |
| H | 0.48010000  | -2.87877700 | -1.43005100 |
| C | 2.25537100  | 0.81637700  | -0.24411800 |
| C | 2.04941300  | 1.53438700  | 0.94939600  |
| C | 1.96239900  | 1.46304000  | -1.45660400 |
| C | 1.53225700  | 2.83579200  | 0.93453100  |
| H | 2.35439700  | 1.09375600  | 1.89652200  |
| C | 1.44903200  | 2.76254400  | -1.47747300 |
| H | 2.15885300  | 0.95188900  | -2.39574100 |
| C | 1.22003500  | 3.44998200  | -0.28127500 |
| H | 1.40688600  | 3.37846200  | 1.86725000  |

|                 |             |             |             |
|-----------------|-------------|-------------|-------------|
| H               | 1.24491300  | 3.24577600  | -2.42835900 |
| H               | 0.83559800  | 4.46499600  | -0.29853900 |
| <b>Reactant</b> |             |             |             |
| C               | 1.99929200  | 0.36485400  | -1.12201500 |
| H               | 1.71605900  | -0.25145900 | -1.98339900 |
| C               | 3.54073400  | 0.37751000  | -1.04082300 |
| H               | 3.88193600  | 1.25070500  | -0.45199200 |
| H               | 4.00169900  | 0.53325600  | -2.02414400 |
| C               | 4.19905300  | -0.74013400 | -0.32291800 |
| C               | 5.67075400  | -0.91394300 | -0.44674800 |
| H               | 6.02332900  | -1.86025500 | -0.03222700 |
| H               | 6.01475600  | -0.79392300 | -1.47849500 |
| H               | 6.14169500  | -0.10321700 | 0.13108400  |
| C               | 3.44212000  | -1.63522600 | 0.47837900  |
| H               | 4.00529900  | -2.15580300 | 1.25459700  |
| C               | 3.10348100  | -2.73421500 | -0.74548000 |
| H               | 3.67888900  | -3.64329700 | -0.57120600 |
| H               | 3.28508200  | -2.38296800 | -1.76306900 |
| C               | 1.63643800  | -2.66877000 | -0.28160600 |
| H               | 1.33323300  | -3.58434200 | 0.23195600  |
| H               | 0.92223800  | -2.45860200 | -1.08109200 |
| C               | 1.90884100  | -1.48422600 | 0.70643000  |
| C               | 1.34874700  | -0.14863300 | 0.18507300  |
| H               | 0.28619500  | -0.32006700 | -0.02631800 |
| C               | 1.49452300  | -1.78669400 | 2.14729100  |
| H               | 1.87032900  | -1.03231400 | 2.84497300  |
| H               | 0.40254800  | -1.80971000 | 2.22571500  |
| H               | 1.87037600  | -2.76313100 | 2.47145800  |
| C               | 1.44530000  | 1.08069000  | 1.11241300  |
| H               | 0.75337900  | 1.01721200  | 1.95494300  |
| H               | 2.45127800  | 1.15981400  | 1.54854800  |
| C               | 1.16401800  | 2.32000000  | 0.20224400  |
| C               | -0.29601300 | 2.86683300  | 0.36578200  |
| H               | -0.42200700 | 3.67791600  | -0.36135800 |
| H               | -0.36207600 | 3.32991900  | 1.35728600  |
| C               | 1.42652200  | 1.79346600  | -1.25457100 |
| H               | 0.49406600  | 1.74217900  | -1.82061000 |
| C               | 2.11281700  | 3.48212500  | 0.55742800  |
| H               | 1.99092700  | 3.78548400  | 1.60305300  |
| H               | 3.16505700  | 3.20634900  | 0.41691600  |
| H               | 1.91857700  | 4.35926700  | -0.06908200 |
| H               | 2.09414000  | 2.45862000  | -1.81391300 |
| C               | -1.44092000 | 1.88610800  | 0.21376100  |
| C               | -1.94972200 | 1.19531000  | 1.32606200  |

|   |             |             |             |
|---|-------------|-------------|-------------|
| C | -2.05055700 | 1.66028000  | -1.03173700 |
| C | -2.98925700 | 0.27416700  | 1.19642300  |
| H | -1.54705700 | 1.39657500  | 2.31509200  |
| C | -3.09068200 | 0.74148200  | -1.17505700 |
| H | -1.72994100 | 2.22876600  | -1.90040900 |
| C | -3.55268200 | 0.03528400  | -0.06051400 |
| H | -3.37384600 | -0.24032400 | 2.07061700  |
| H | -3.55221500 | 0.58873500  | -2.14499300 |
| C | -4.62580000 | -1.01015900 | -0.22360300 |
| F | -5.49933800 | -0.70052000 | -1.20810000 |
| F | -4.08505500 | -2.22085700 | -0.54942600 |
| F | -5.33738400 | -1.19773900 | 0.91072400  |

**TS-CF<sub>3</sub>**

|   |             |             |             |
|---|-------------|-------------|-------------|
| C | -1.88751600 | 0.19334700  | -0.95028100 |
| H | -0.83856500 | 0.22193400  | -1.25887500 |
| C | -2.60179300 | 1.37100800  | -1.68616900 |
| H | -3.61566200 | 1.50691200  | -1.29450000 |
| H | -2.68503500 | 1.08077000  | -2.73991300 |
| C | -1.72708400 | 2.56608800  | -1.44650000 |
| C | -0.52484800 | 2.74082500  | -2.33621400 |
| H | -0.86394100 | 3.04561700  | -3.33435300 |
| H | 0.15611400  | 3.51554800  | -1.97843300 |
| H | 0.04779600  | 1.81439200  | -2.47532400 |
| C | -1.91838200 | 3.17859900  | -0.26943300 |
| H | -2.88577800 | 3.03390200  | 0.21719400  |
| C | -0.81126700 | 3.52885900  | 0.66644300  |
| H | -0.87937300 | 4.51610600  | 1.13880400  |
| H | 0.16555300  | 3.46598700  | 0.18133300  |
| C | -0.93362600 | 2.48549700  | 1.80429400  |
| H | -1.66884300 | 2.88275000  | 2.51947500  |
| H | -0.00383000 | 2.42216900  | 2.38598700  |
| C | -1.45624400 | 1.03633400  | 1.68039500  |
| C | -1.85335900 | 0.14997900  | 0.62418300  |
| H | -0.62436600 | 0.16211300  | 1.00048800  |
| C | -1.60491500 | 0.48190900  | 3.10058900  |
| H | -2.66378300 | 0.30494900  | 3.31746300  |
| H | -1.07752100 | -0.46341700 | 3.24227600  |
| H | -1.21814700 | 1.18770000  | 3.83440300  |
| C | -2.46283600 | -1.20338400 | 1.01287100  |
| H | -2.07286600 | -1.63564700 | 1.93330100  |
| H | -3.52760800 | -0.99119500 | 1.19816500  |
| C | -2.33893800 | -2.15698500 | -0.19382200 |
| C | -0.98680500 | -2.94590400 | -0.19796200 |

|   |             |             |             |
|---|-------------|-------------|-------------|
| H | -0.99067700 | -3.57907300 | -1.09204200 |
| H | -1.00545800 | -3.62760200 | 0.66090400  |
| C | -2.48385700 | -1.17241000 | -1.36983400 |
| H | -2.01728200 | -1.53463300 | -2.29080500 |
| C | -3.47238500 | -3.19836200 | -0.18414000 |
| H | -3.41137900 | -3.85056300 | 0.69381800  |
| H | -4.45440200 | -2.71372600 | -0.17741700 |
| H | -3.42261700 | -3.83616300 | -1.07248000 |
| H | -3.54961800 | -1.03753600 | -1.59071700 |
| C | 0.31024900  | -2.16298000 | -0.16183300 |
| C | 0.90741100  | -1.80954900 | 1.06364500  |
| C | 0.97554700  | -1.79869200 | -1.34257800 |
| C | 2.09836800  | -1.08231000 | 1.10816100  |
| H | 0.46400800  | -2.15375900 | 1.99522200  |
| C | 2.16820700  | -1.07245500 | -1.31046700 |
| H | 0.56737100  | -2.09943600 | -2.30358100 |
| C | 2.72233400  | -0.69736000 | -0.08382400 |
| H | 2.55182100  | -0.83451900 | 2.06297000  |
| H | 2.66756000  | -0.80486900 | -2.23529600 |
| C | 4.01901400  | 0.07332800  | -0.01836000 |
| F | 4.34998600  | 0.61876500  | -1.20855400 |
| F | 3.93738000  | 1.08932300  | 0.88290300  |
| F | 5.04962100  | -0.71153300 | 0.37086700  |

**Reactant**

|   |             |             |             |
|---|-------------|-------------|-------------|
| C | -1.39318400 | -0.43302100 | -1.10679800 |
| H | -1.20558100 | 0.19926500  | -1.98259800 |
| C | -2.91682000 | -0.66002700 | -1.01031100 |
| H | -3.12746400 | -1.55345400 | -0.39158800 |
| H | -3.35570300 | -0.90837300 | -1.98437400 |
| C | -3.71934900 | 0.37741500  | -0.31897700 |
| C | -5.20016600 | 0.35764500  | -0.45551100 |
| H | -5.67952100 | 1.24108400  | -0.03006400 |
| H | -5.51346500 | 0.21484400  | -1.49454700 |
| H | -5.56647900 | -0.52140200 | 0.09710700  |
| C | -3.08967800 | 1.37897200  | 0.46492700  |
| H | -3.71931000 | 1.83988400  | 1.22753200  |
| C | -2.90226300 | 2.48234000  | -0.78873100 |
| H | -3.60958100 | 3.30010800  | -0.65271400 |
| H | -3.00831600 | 2.07517000  | -1.79610200 |
| C | -1.44922900 | 2.64668700  | -0.30412700 |
| H | -1.30170100 | 3.60179900  | 0.20554900  |
| H | -0.69862900 | 2.54599600  | -1.09160100 |
| C | -1.55072200 | 1.44435000  | 0.69440500  |
| C | -0.80995900 | 0.19369100  | 0.18273600  |

|   |             |             |             |
|---|-------------|-------------|-------------|
| H | 0.21405100  | 0.51246300  | -0.04805300 |
| C | -1.18193300 | 1.81312300  | 2.13220800  |
| H | -1.44833900 | 1.01942800  | 2.83642100  |
| H | -0.10405200 | 1.98958600  | 2.20961000  |
| H | -1.69080500 | 2.72982600  | 2.44883900  |
| C | -0.71530100 | -1.01816000 | 1.13313300  |
| H | -0.02891600 | -0.83948600 | 1.96345500  |
| H | -1.69334200 | -1.23188500 | 1.58706500  |
| C | -0.27159300 | -2.22247600 | 0.24185100  |
| C | 1.25417300  | -2.55291500 | 0.39413800  |
| H | 1.48070200  | -3.36506200 | -0.30687100 |
| H | 1.39977400  | -2.96432100 | 1.39986400  |
| C | -0.62629700 | -1.76976600 | -1.21937800 |
| H | 0.28052200  | -1.60030300 | -1.80373800 |
| C | -1.03855100 | -3.50119200 | 0.63424700  |
| H | -0.85729800 | -3.76458400 | 1.68207900  |
| H | -2.12151300 | -3.38064100 | 0.50970300  |
| H | -0.73132300 | -4.35321900 | 0.01851700  |
| H | -1.20153200 | -2.53415800 | -1.75386500 |
| C | 2.24864500  | -1.43003200 | 0.18267200  |
| C | 2.67033300  | -0.62848700 | 1.25810800  |
| C | 2.80197300  | -1.17299800 | -1.08365900 |
| C | 3.56557900  | 0.42262700  | 1.07417900  |
| H | 2.31118700  | -0.84164700 | 2.26119900  |
| C | 3.69824000  | -0.12538100 | -1.28680900 |
| H | 2.54920000  | -1.81516500 | -1.92278300 |
| C | 4.07462200  | 0.69179500  | -0.20788000 |
| H | 3.88504400  | 1.02739500  | 1.91656600  |
| H | 4.11738500  | 0.05655500  | -2.27086600 |
| C | 4.97809500  | 1.78819700  | -0.41041200 |
| N | 5.69504300  | 2.68942600  | -0.57625900 |

**TS-CN**

|   |             |            |             |
|---|-------------|------------|-------------|
| C | -1.46571600 | 0.08396700 | -0.88943800 |
| H | -0.46510900 | 0.27296100 | -1.28893700 |
| C | -2.40304400 | 1.17014500 | -1.51066500 |
| H | -3.37918800 | 1.16301900 | -1.01362900 |
| H | -2.55822400 | 0.89118100 | -2.55921300 |
| C | -1.66792000 | 2.46446000 | -1.32323300 |
| C | -0.60657700 | 2.81535500 | -2.33203600 |
| H | -1.09384800 | 3.11314800 | -3.26909900 |
| H | 0.01783200  | 3.65317900 | -2.01547300 |
| H | 0.04857900  | 1.97025000 | -2.58182100 |
| C | -1.80005500 | 3.01820300 | -0.10938800 |

|                 |             |             |             |
|-----------------|-------------|-------------|-------------|
| H               | -2.68178800 | 2.74030000  | 0.47280300  |
| C               | -0.64614200 | 3.48233900  | 0.71386700  |
| H               | -0.77601800 | 4.44598300  | 1.22066800  |
| H               | 0.27145900  | 3.54440800  | 0.12447300  |
| C               | -0.51984000 | 2.41124700  | 1.82595400  |
| H               | -1.20601200 | 2.71059200  | 2.63125700  |
| H               | 0.47202300  | 2.44097400  | 2.29727700  |
| C               | -0.89320500 | 0.91456400  | 1.71379400  |
| C               | -1.28842100 | 0.00898000  | 0.67270600  |
| H               | -0.03843300 | 0.15015900  | 0.95009800  |
| C               | -0.85761400 | 0.32745600  | 3.12788300  |
| H               | -1.87612100 | 0.07357500  | 3.44182400  |
| H               | -0.25567200 | -0.57995800 | 3.19778900  |
| H               | -0.45186400 | 1.04838400  | 3.83653300  |
| C               | -1.71452500 | -1.40960700 | 1.06948700  |
| H               | -1.21482500 | -1.81001900 | 1.95009400  |
| H               | -2.78064100 | -1.32086100 | 1.33198000  |
| C               | -1.57058600 | -2.32204400 | -0.16694000 |
| C               | -0.14214200 | -2.95297800 | -0.28204000 |
| H               | -0.12470100 | -3.53476100 | -1.21041900 |
| H               | -0.04012700 | -3.67650300 | 0.53546000  |
| C               | -1.90866200 | -1.34078300 | -1.30660400 |
| H               | -1.45920000 | -1.62577700 | -2.26258200 |
| C               | -2.57556800 | -3.48642000 | -0.10674600 |
| H               | -2.38336900 | -4.13750000 | 0.75271600  |
| H               | -3.60354700 | -3.11733500 | -0.02837300 |
| H               | -2.51154500 | -4.10304700 | -1.00898500 |
| H               | -2.99428400 | -1.33805700 | -1.46055500 |
| C               | 1.06080400  | -2.03241300 | -0.25683000 |
| C               | 1.70774100  | -1.72747400 | 0.95584300  |
| C               | 1.59169900  | -1.48673100 | -1.43874600 |
| C               | 2.80935800  | -0.87214400 | 0.99980000  |
| H               | 1.37446900  | -2.20366500 | 1.87497200  |
| C               | 2.69144900  | -0.63143000 | -1.41378200 |
| H               | 1.14924800  | -1.74776000 | -2.39614100 |
| C               | 3.29822700  | -0.30284500 | -0.18852600 |
| H               | 3.30700800  | -0.66150800 | 1.94098000  |
| H               | 3.09197400  | -0.22430000 | -2.33637300 |
| C               | 4.41237400  | 0.60060700  | -0.14899600 |
| N               | 5.29887300  | 1.35260200  | -0.10850200 |
| <b>Reactant</b> |             |             |             |
| C               | -1.06355800 | 0.22658300  | 0.99131000  |
| H               | 0.01500700  | 0.05781300  | 1.02617300  |
| C               | -1.69710200 | -0.82724800 | 2.00399400  |



|   |             |             |             |
|---|-------------|-------------|-------------|
| H | -2.74744500 | -0.54214800 | 2.13685100  |
| H | -1.17724300 | -0.80332600 | 2.96336600  |
| C | -1.61929500 | -2.11481000 | 1.31902500  |
| C | -0.67232500 | -3.16105200 | 1.73202000  |
| H | -0.67719300 | -3.29120500 | 2.82039700  |
| H | -0.81645800 | -4.10955100 | 1.21285500  |
| H | 0.34291000  | -2.79343100 | 1.49411000  |
| C | -2.43960800 | -2.23273100 | 0.12288200  |
| H | -3.38306100 | -2.69171300 | 0.47574100  |
| C | -1.95798400 | -2.93276700 | -1.18566100 |
| H | -2.33807200 | -3.93858800 | -1.36996600 |
| H | -0.86918700 | -2.94336900 | -1.28177200 |
| C | -2.63258900 | -1.77019600 | -1.96890800 |
| H | -3.61265600 | -2.05889600 | -2.35807000 |
| H | -2.04365100 | -1.33473200 | -2.78006500 |
| C | -2.75847600 | -0.90278600 | -0.67208100 |
| C | -1.54143100 | 0.06035100  | -0.48636200 |
| H | -0.71353900 | -0.40782400 | -1.03205500 |
| C | -4.14025700 | -0.28830700 | -0.43803000 |
| H | -4.20639000 | 0.28133200  | 0.49517000  |
| H | -4.40871400 | 0.38896100  | -1.25363700 |
| H | -4.90886500 | -1.06743700 | -0.40999900 |
| C | -1.72524900 | 1.51299700  | -1.01019800 |
| H | -1.22763300 | 1.65976500  | -1.97307800 |
| H | -2.78283600 | 1.72694400  | -1.18055000 |
| C | -1.19397700 | 2.50167300  | 0.07498000  |
| C | 0.27750500  | 2.97378800  | -0.18890100 |
| H | 0.27180400  | 3.50434400  | -1.14837200 |
| H | 0.51877800  | 3.72165500  | 0.57490000  |
| C | -1.34924500 | 1.68490500  | 1.38899600  |
| H | -0.69393800 | 2.03717400  | 2.19211900  |
| C | -2.05928000 | 3.77571100  | 0.12632900  |
| H | -1.99373900 | 4.33252900  | -0.81462200 |
| H | -3.11278300 | 3.53019600  | 0.29684400  |
| H | -1.73566700 | 4.44482400  | 0.93063900  |
| H | -2.38161600 | 1.78212200  | 1.74727700  |
| C | 1.38396200  | 1.94126200  | -0.21169400 |
| C | 1.69211400  | 1.22672000  | -1.38332800 |
| C | 2.15011400  | 1.68684400  | 0.94040400  |
| C | 2.68516100  | 0.24871900  | -1.39684400 |
| H | 1.16123700  | 1.44862800  | -2.30444800 |
| C | 3.14878900  | 0.71431500  | 0.94942600  |
| H | 1.97130700  | 2.26623500  | 1.84198900  |
| C | 3.38616400  | -0.00861300 | -0.21914600 |

|   |            |             |             |
|---|------------|-------------|-------------|
| H | 2.92870200 | -0.30261300 | -2.29724900 |
| H | 3.74290300 | 0.51671000  | 1.83371400  |
| N | 4.41037000 | -1.07108200 | -0.21138600 |
| O | 5.00181000 | -1.28357300 | 0.84705800  |
| O | 4.59379600 | -1.69254900 | -1.25803800 |

**TS-NO<sub>2</sub>**

|   |             |             |             |
|---|-------------|-------------|-------------|
| C | -1.59422800 | 0.15507500  | -0.97846400 |
| H | -0.53433600 | 0.20194600  | -1.24635800 |
| C | -2.30359200 | 1.30041800  | -1.76841200 |
| H | -3.33739800 | 1.41628600  | -1.42541000 |
| H | -2.33127900 | 0.98838200  | -2.81884500 |
| C | -1.47301100 | 2.52347700  | -1.51335300 |
| C | -0.23742900 | 2.71719700  | -2.35183800 |
| H | -0.53950400 | 2.99864300  | -3.36853800 |
| H | 0.40699600  | 3.51473800  | -1.97697500 |
| H | 0.36476000  | 1.80446600  | -2.45233100 |
| C | -1.73561000 | 3.15073200  | -0.35799400 |
| H | -2.71984300 | 2.98546100  | 0.08640200  |
| C | -0.68464000 | 3.55270300  | 0.62044800  |
| H | -0.80341500 | 4.54652800  | 1.06822000  |
| H | 0.31529000  | 3.50981900  | 0.18254100  |
| C | -0.83014800 | 2.52853500  | 1.77238000  |
| H | -1.61189100 | 2.91457400  | 2.44317500  |
| H | 0.07112900  | 2.50672700  | 2.40020500  |
| C | -1.29914300 | 1.06100000  | 1.65289200  |
| C | -1.62146400 | 0.14273100  | 0.59704300  |
| H | -0.41067200 | 0.20982800  | 1.02263300  |
| C | -1.48969300 | 0.52634400  | 3.07592200  |
| H | -2.55032700 | 0.31679500  | 3.25133700  |
| H | -0.93765400 | -0.39749500 | 3.25934700  |
| H | -1.15889800 | 1.25804600  | 3.81167600  |
| C | -2.19917600 | -1.22371900 | 0.98914000  |
| H | -1.82335100 | -1.62882600 | 1.92773400  |
| H | -3.27466800 | -1.04191700 | 1.14180000  |
| C | -2.01443800 | -2.19355900 | -0.19707600 |
| C | -0.64691000 | -2.95534000 | -0.14449900 |
| H | -0.61636400 | -3.61424700 | -1.01902200 |
| H | -0.67351800 | -3.61096500 | 0.73413900  |
| C | -2.14177400 | -1.23221800 | -1.39399800 |
| H | -1.63460900 | -1.59736000 | -2.29203400 |
| C | -3.12465700 | -3.25989800 | -0.20559300 |
| H | -3.07532900 | -3.89875100 | 0.68280800  |
| H | -4.11636700 | -2.79640300 | -0.23365200 |

|   |             |             |             |
|---|-------------|-------------|-------------|
| H | -3.03573100 | -3.90794600 | -1.08331100 |
| H | -3.20202100 | -1.12790700 | -1.65401200 |
| C | 0.63224400  | -2.14552300 | -0.10184700 |
| C | 1.17873400  | -1.72371300 | 1.12641900  |
| C | 1.32852500  | -1.82347200 | -1.27966000 |
| C | 2.34891200  | -0.96434500 | 1.18124400  |
| H | 0.71313100  | -2.03946300 | 2.05696100  |
| C | 2.50268000  | -1.07109000 | -1.24699100 |
| H | 0.95868400  | -2.17986800 | -2.23680600 |
| C | 2.98354500  | -0.63281000 | -0.01438600 |
| H | 2.78280800  | -0.64962900 | 2.12319000  |
| H | 3.04656400  | -0.82722200 | -2.15206500 |
| N | 4.21017200  | 0.19125200  | 0.03088800  |
| O | 4.78010700  | 0.41692600  | -1.03378300 |
| O | 4.56792400  | 0.60955500  | 1.13162400  |

**TS<sub>CHO</sub>**

|   |             |             |             |
|---|-------------|-------------|-------------|
| C | -3.57121700 | -0.78175900 | -1.34899400 |
| H | -4.23530200 | 0.08263000  | -1.45800200 |
| H | -3.22068000 | -1.06515600 | -2.34636800 |
| H | -4.16815600 | -1.61241800 | -0.95851600 |
| C | -2.38349300 | -0.46890100 | -0.41773700 |
| C | -1.38237100 | -1.64258400 | -0.36716000 |
| C | 0.03611400  | -1.06772200 | -0.13228000 |
| C | 1.13559700  | -1.95256200 | -0.80447800 |
| H | 0.87950800  | -2.99859400 | -0.60005900 |
| C | 2.41957700  | -1.50059100 | -0.16822800 |
| C | 2.93297100  | -0.37153500 | -0.67671200 |
| C | 3.36682100  | 0.78693100  | 0.15581500  |
| H | 3.45051800  | 0.51514100  | 1.21052600  |
| H | 4.31416900  | 1.25439400  | -0.13807200 |
| C | 2.26100100  | 1.85477300  | -0.05442300 |
| C | 0.76419700  | 1.58847800  | -0.37297100 |
| C | -1.50131400 | 0.65133500  | -1.00939200 |
| H | -1.43749000 | 0.51035700  | -2.10027800 |
| H | -1.90781700 | 1.64902000  | -0.85524000 |
| C | 2.78496900  | -2.10826700 | 1.16048000  |
| H | 3.60956800  | -1.58682200 | 1.65041100  |
| H | 1.94054000  | -2.15454100 | 1.86152000  |
| H | 3.10794300  | -3.14476500 | 1.00070000  |
| H | -1.63511800 | -2.39182300 | 0.38935000  |
| C | -2.99017700 | -0.11641400 | 0.96987400  |
| H | -3.80853100 | 0.61340700  | 0.83753800  |

|   |             |             |             |
|---|-------------|-------------|-------------|
| H | -3.50193400 | -1.00122000 | 1.37467000  |
| H | 2.64091800  | -0.10610100 | -1.69512300 |
| H | 1.12867900  | -1.81141500 | -1.89074300 |
| C | -0.07285500 | 0.44948900  | -0.50780400 |
| H | 0.02933200  | 1.13576300  | 0.64834900  |
| C | 0.13718700  | 2.94124500  | -0.75238800 |
| H | -0.76354200 | 3.16450600  | -0.17614900 |
| H | 0.84266300  | 3.75123800  | -0.57108800 |
| H | -0.12716400 | 2.95470900  | -1.81449800 |
| H | 2.54691700  | 2.43238400  | -0.94391300 |
| H | 2.26997500  | 2.58737200  | 0.76285700  |
| H | -1.39907400 | -2.15730600 | -1.33487600 |
| H | 0.24498200  | -1.07999400 | 0.94292400  |
| C | -2.19099300 | 0.46490500  | 2.10444800  |
| O | -1.06896900 | 0.95304800  | 2.05781800  |
| H | -2.72522100 | 0.47392700  | 3.07323800  |

**TS<sub>NO2</sub>**

|   |             |             |             |
|---|-------------|-------------|-------------|
| C | -3.36597100 | 0.03770800  | -1.87616000 |
| H | -3.98708100 | 0.92651200  | -1.72241000 |
| H | -2.94099500 | 0.09409300  | -2.88289300 |
| H | -4.01810400 | -0.84028300 | -1.83907600 |
| C | -2.24040800 | -0.05902900 | -0.82783100 |
| C | -1.31008700 | -1.26239800 | -1.07276100 |
| C | 0.09907900  | -0.90657500 | -0.53347500 |
| C | 1.21181600  | -1.66278700 | -1.32637100 |
| H | 0.88132500  | -2.70319100 | -1.42545200 |
| C | 2.45444200  | -1.49020900 | -0.50144700 |
| C | 3.09012100  | -0.32368100 | -0.68073000 |
| C | 3.52862200  | 0.55809300  | 0.43896000  |
| H | 3.50145000  | 0.03709300  | 1.39871900  |
| H | 4.52632200  | 1.00063500  | 0.33419500  |
| C | 2.51893700  | 1.73300900  | 0.41945100  |
| C | 1.04289800  | 1.67678500  | -0.03328400 |
| C | -1.25795100 | 1.12509300  | -0.95356900 |
| H | -1.11488700 | 1.34645500  | -2.02209600 |
| H | -1.63257600 | 2.03632900  | -0.49213400 |
| C | 2.65560600  | -2.42872600 | 0.65901800  |
| H | 3.47450200  | -2.12139600 | 1.31221500  |
| H | 1.75482900  | -2.55871600 | 1.27346700  |
| H | 2.90855300  | -3.42350100 | 0.27109200  |
| H | -1.67709000 | -2.19108500 | -0.62570300 |
| C | -2.96509600 | -0.11276900 | 0.54541700  |
| H | -3.49469400 | 0.82223200  | 0.74152900  |

|   |             |             |             |
|---|-------------|-------------|-------------|
| H | -3.65463400 | -0.95543600 | 0.58184200  |
| H | 2.91213200  | 0.20282200  | -1.62124700 |
| H | 1.31277100  | -1.24380300 | -2.33347200 |
| C | 0.11707900  | 0.66804000  | -0.44533700 |
| H | 0.18822900  | 0.98376000  | 0.79821700  |
| C | 0.51365200  | 3.11563600  | -0.06137100 |
| H | -0.37706200 | 3.24081900  | 0.55911600  |
| H | 1.26783800  | 3.80970600  | 0.30670500  |
| H | 0.25498800  | 3.40274600  | -1.08566800 |
| H | 2.90246600  | 2.47091300  | -0.30037600 |
| H | 2.51897200  | 2.26918200  | 1.37790300  |
| H | -1.24358700 | -1.43494100 | -2.15322800 |
| H | 0.17652900  | -1.25660400 | 0.50159100  |
| O | -1.31414400 | 0.65935700  | 2.03032900  |
| N | -2.03977800 | -0.30324700 | 1.71972500  |
| O | -2.02563000 | -1.38445200 | 2.28292300  |

**TS<sub>CN</sub>**

|   |             |             |             |
|---|-------------|-------------|-------------|
| C | -3.67890800 | -0.60212200 | -1.27448800 |
| H | -4.32080700 | 0.28524800  | -1.28322900 |
| H | -3.37338600 | -0.80815200 | -2.30493100 |
| H | -4.28370400 | -1.44814600 | -0.93206500 |
| C | -2.45076600 | -0.40307300 | -0.37202800 |
| C | -1.46648400 | -1.58417100 | -0.45675400 |
| C | -0.04241900 | -1.06234100 | -0.14353600 |
| C | 1.04298700  | -1.92959600 | -0.85400400 |
| H | 0.77572200  | -2.97852100 | -0.68025100 |
| C | 2.34199400  | -1.51587700 | -0.22545600 |
| C | 2.88129900  | -0.39952900 | -0.73466600 |
| C | 3.36864700  | 0.73628100  | 0.09861600  |
| H | 3.47221600  | 0.45384300  | 1.14872000  |
| H | 4.31867600  | 1.18429200  | -0.21589900 |
| C | 2.28498000  | 1.82936000  | -0.07313000 |
| C | 0.77945500  | 1.60694200  | -0.33547600 |
| C | -1.56439200 | 0.76530100  | -0.85631600 |
| H | -1.52928200 | 0.75470400  | -1.95599100 |
| H | -1.95836300 | 1.73974200  | -0.56966700 |
| C | 2.71267700  | -2.14806300 | 1.08995300  |
| H | 3.56449300  | -1.66012500 | 1.56745100  |
| H | 1.88230900  | -2.17199300 | 1.80801900  |
| H | 2.99688500  | -3.19316300 | 0.91355100  |
| H | -1.73343200 | -2.41504700 | 0.20328000  |
| C | -2.98371000 | -0.15732700 | 1.08193800  |
| H | -3.80705300 | 0.56632400  | 1.05450200  |

|   |             |             |             |
|---|-------------|-------------|-------------|
| H | -3.39069300 | -1.08683400 | 1.49448000  |
| H | 2.58154600  | -0.11627400 | -1.74621600 |
| H | 1.02412500  | -1.75241500 | -1.93483900 |
| C | -0.11779300 | 0.49289100  | -0.40058100 |
| H | 0.07256500  | 1.06926300  | 0.72889900  |
| C | 0.15628400  | 2.97705800  | -0.62329000 |
| H | -0.67681100 | 3.20515300  | 0.04570300  |
| H | 0.89451300  | 3.76861800  | -0.50392400 |
| H | -0.21886200 | 3.00978800  | -1.65136300 |
| H | 2.54426800  | 2.39779700  | -0.97868300 |
| H | 2.34164500  | 2.57173500  | 0.73431700  |
| H | -1.48275200 | -1.97658100 | -1.48059200 |
| H | 0.13400400  | -1.16475100 | 0.93221500  |
| C | -1.96661700 | 0.37407200  | 1.99035300  |
| N | -1.08731800 | 0.84095200  | 2.59138700  |

**TS<sub>oCH<sub>3</sub></sub>**

|   |             |             |             |
|---|-------------|-------------|-------------|
| C | -3.24471400 | -1.67493300 | -1.23065700 |
| H | -3.88100700 | -1.03346300 | -1.84971200 |
| H | -2.76377200 | -2.40666500 | -1.88702200 |
| H | -3.89457700 | -2.22444700 | -0.54157000 |
| C | -2.19333100 | -0.86070300 | -0.46178400 |
| C | -1.23367400 | -1.75998400 | 0.36361700  |
| C | 0.15811400  | -1.06704100 | 0.40014800  |
| C | 1.32640400  | -2.02567900 | -0.03725200 |
| H | 1.23890900  | -2.94232900 | 0.55661600  |
| C | 2.60301300  | -1.26122500 | 0.21109800  |
| C | 2.93054900  | -0.33473200 | -0.70743200 |
| C | 3.29898700  | 1.07809500  | -0.33661600 |
| H | 4.09010200  | 1.16384300  | 0.41255400  |
| H | 3.60553400  | 1.67235800  | -1.20217500 |
| C | 1.97480000  | 1.64632900  | 0.29651300  |
| C | 0.76505200  | 1.34042600  | -0.58935900 |
| C | -1.21310600 | -0.12156700 | -1.40742000 |
| H | -0.88489100 | -0.80149000 | -2.20600100 |
| H | -1.65478400 | 0.75446300  | -1.88373500 |
| C | 3.17642200  | -1.33198000 | 1.60285300  |
| H | 4.00259200  | -0.63450400 | 1.75625300  |
| H | 2.42547900  | -1.15616300 | 2.38492900  |
| H | 3.56692700  | -2.34225900 | 1.77857000  |
| H | -1.61438500 | -1.95045800 | 1.37103200  |
| C | -2.93851900 | 0.15480500  | 0.42476000  |
| H | -3.61759600 | 0.76496600  | -0.18939600 |
| H | -3.54212100 | -0.37911900 | 1.17215100  |

|   |             |             |             |
|---|-------------|-------------|-------------|
| H | 2.49415600  | -0.44185200 | -1.70161800 |
| H | 1.20629700  | -2.29985500 | -1.09200600 |
| C | -0.00367800 | 0.16197000  | -0.52993000 |
| H | -0.38328000 | 1.16481700  | 0.19814800  |
| C | 0.50042100  | 2.40637900  | -1.62617500 |
| H | -0.33327100 | 2.20136400  | -2.29342700 |
| H | 0.35797600  | 3.38153800  | -1.15033000 |
| H | 1.40824800  | 2.48930900  | -2.23610700 |
| H | 2.03852300  | 2.73002700  | 0.44347600  |
| H | 1.85056900  | 1.17850200  | 1.27650100  |
| H | -1.14282800 | -2.73316400 | -0.13089800 |
| H | 0.37947500  | -0.71757400 | 1.41282100  |
| C | -2.64821400 | 1.95224300  | 1.98621900  |
| H | -3.19766800 | 1.41816900  | 2.77018800  |
| H | -1.85961800 | 2.55208800  | 2.44305800  |
| H | -3.33695200 | 2.60545700  | 1.43649100  |
| O | -2.01364900 | 1.02150300  | 1.09996500  |

**TS<sub>F</sub>**

|   |             |             |             |
|---|-------------|-------------|-------------|
| C | -3.76544500 | -0.54980400 | -1.00704500 |
| H | -4.40384300 | 0.33967900  | -0.98064200 |
| H | -3.53894300 | -0.77122500 | -2.05432500 |
| H | -4.34523800 | -1.38925600 | -0.60964600 |
| C | -2.46891400 | -0.34571000 | -0.20560100 |
| C | -1.50499200 | -1.54244600 | -0.31776500 |
| C | -0.06258200 | -1.02360400 | -0.08544000 |
| C | 0.98162100  | -1.82540000 | -0.92634700 |
| H | 0.72222100  | -2.88635000 | -0.83492600 |
| C | 2.30716700  | -1.46533900 | -0.31785500 |
| C | 2.81379400  | -0.29086300 | -0.72000900 |
| C | 3.30750800  | 0.75812900  | 0.21956100  |
| H | 3.42676800  | 0.36575400  | 1.23189500  |
| H | 4.25149400  | 1.24252000  | -0.05735500 |
| C | 2.21639000  | 1.85836800  | 0.17818800  |
| C | 0.72062400  | 1.65717000  | -0.13779800 |
| C | -1.59898100 | 0.79413200  | -0.77058700 |
| H | -1.55111400 | 0.70501400  | -1.86631600 |
| H | -2.00097100 | 1.78206700  | -0.55219900 |
| C | 2.73877900  | -2.22838200 | 0.90646600  |
| H | 3.60318600  | -1.78022200 | 1.40043800  |
| H | 1.93720600  | -2.34518800 | 1.64769400  |
| H | 3.02954500  | -3.24314800 | 0.60677000  |
| H | -1.74727700 | -2.35224400 | 0.37707900  |
| C | -2.86955900 | -0.04311800 | 1.24205600  |

|                          |             |             |             |
|--------------------------|-------------|-------------|-------------|
| H                        | -3.55015100 | 0.81101400  | 1.30394400  |
| H                        | -3.32028300 | -0.91196700 | 1.72871500  |
| H                        | 2.47441500  | 0.09482600  | -1.68425200 |
| H                        | 0.91377600  | -1.55304300 | -1.98545300 |
| C                        | -0.16772100 | 0.54045900  | -0.27512900 |
| H                        | -0.05813800 | 1.04094800  | 0.86986900  |
| C                        | 0.10338200  | 3.03854000  | -0.36460500 |
| H                        | -0.81134500 | 3.19610300  | 0.20904200  |
| H                        | 0.80505600  | 3.82624200  | -0.09242900 |
| H                        | -0.14527900 | 3.15358200  | -1.42573400 |
| H                        | 2.48273900  | 2.53566700  | -0.64655800 |
| H                        | 2.25852700  | 2.50160200  | 1.06816900  |
| H                        | -1.57775000 | -1.95794800 | -1.32984800 |
| H                        | 0.19374400  | -1.17839900 | 0.96673400  |
| F                        | -1.72830800 | 0.30902100  | 2.02231000  |
| <b>TS<sub>SCH3</sub></b> |             |             |             |
| C                        | -2.90570100 | -2.06761700 | -1.40638300 |
| H                        | -3.63386800 | -1.47584100 | -1.97121800 |
| H                        | -2.36247300 | -2.70066900 | -2.11549100 |
| H                        | -3.46212200 | -2.72548400 | -0.73149100 |
| C                        | -1.93352000 | -1.17060500 | -0.61819800 |
| C                        | -0.85346900 | -1.99538900 | 0.11517500  |
| C                        | 0.44021300  | -1.13954600 | 0.19062800  |
| C                        | 1.73360600  | -2.00398100 | 0.00031600  |
| H                        | 1.59024500  | -2.93259800 | 0.56375300  |
| C                        | 2.83474200  | -1.12814900 | 0.53040900  |
| C                        | 3.24685000  | -0.16592400 | -0.30801700 |
| C                        | 3.36925900  | 1.26899100  | 0.08318500  |
| H                        | 3.33114400  | 1.38968000  | 1.16795900  |
| H                        | 4.27199300  | 1.78067200  | -0.27097400 |
| C                        | 2.16135600  | 1.97626700  | -0.59581600 |
| C                        | 0.82318000  | 1.30719400  | -1.01763300 |
| C                        | -1.06439800 | -0.31445600 | -1.56282300 |
| H                        | -0.71247800 | -0.94367400 | -2.39673800 |
| H                        | -1.59900000 | 0.52109500  | -2.00954800 |
| C                        | 3.07956900  | -1.15709500 | 2.01622700  |
| H                        | 3.74536900  | -0.35860800 | 2.34944700  |
| H                        | 2.15495800  | -1.10696300 | 2.60695800  |
| H                        | 3.55978700  | -2.10827900 | 2.27831800  |
| H                        | -1.16974600 | -2.32071700 | 1.11066400  |
| C                        | -2.79336800 | -0.28914300 | 0.32110100  |
| H                        | -3.45973100 | 0.33359000  | -0.28492200 |
| H                        | -3.41427600 | -0.93295100 | 0.95111300  |
| H                        | 3.07859000  | -0.32838100 | -1.37496400 |



|   |             |             |             |
|---|-------------|-------------|-------------|
| H | 1.86819700  | -2.26754900 | -1.05456300 |
| C | 0.20403700  | 0.04430700  | -0.80158200 |
| H | -0.07257600 | 1.15687700  | -0.04279200 |
| C | 0.13675100  | 2.24969900  | -2.01788500 |
| H | -0.93212100 | 2.36692600  | -1.83261600 |
| H | 0.58668400  | 3.24161500  | -1.97253500 |
| H | 0.26515800  | 1.86858000  | -3.03680400 |
| H | 2.51827500  | 2.33124300  | -1.57068200 |
| H | 1.89027400  | 2.89329400  | -0.05577400 |
| H | -0.64740900 | -2.90162800 | -0.46560200 |
| H | 0.51527800  | -0.69187600 | 1.18688000  |
| C | -3.14566600 | 2.10854900  | 1.78584400  |
| H | -3.99130300 | 1.64359300  | 2.29681500  |
| H | -2.69450300 | 2.84845100  | 2.44970700  |
| H | -3.47935800 | 2.59723700  | 0.86797600  |
| S | -1.85910200 | 0.85523400  | 1.44186500  |

**TS<sub>CH=CH2</sub>**

|   |             |             |             |
|---|-------------|-------------|-------------|
| C | 0.10270200  | -1.11328700 | 0.00741200  |
| H | 0.32267100  | -1.01311800 | 1.07482400  |
| C | 1.24313200  | -2.00286800 | -0.59037100 |
| H | 1.22757500  | -1.96166600 | -1.68492500 |
| H | 1.03543500  | -3.03602800 | -0.29014800 |
| C | 2.50443300  | -1.43569700 | -0.00401200 |
| C | 2.89875900  | -1.90317000 | 1.37221500  |
| H | 3.27588500  | -2.93125800 | 1.30220900  |
| H | 3.69475900  | -1.29909700 | 1.81211400  |
| H | 2.05653100  | -1.93401000 | 2.07659100  |
| C | 2.96768100  | -0.33515800 | -0.61415000 |
| H | 2.67022700  | -0.17893500 | -1.65357300 |
| C | 3.33997600  | 0.91475000  | 0.11094500  |
| H | 4.26704200  | 1.39847700  | -0.21889600 |
| H | 3.42714400  | 0.74358800  | 1.18620700  |
| C | 2.18637800  | 1.90507700  | -0.20228200 |
| H | 2.47178600  | 2.43713400  | -1.12002900 |
| H | 2.12374100  | 2.69879200  | 0.55490100  |
| C | 0.72692700  | 1.53353100  | -0.56047400 |
| C | -0.07436300 | 0.34930200  | -0.53698500 |
| H | -0.07252700 | 1.15121600  | 0.48740700  |
| C | 0.05919300  | 2.78865600  | -1.13239100 |
| H | -0.09373700 | 2.66342300  | -2.20997200 |
| H | -0.91225900 | 2.99653300  | -0.68046400 |
| H | 0.68942800  | 3.66410300  | -0.97843100 |

|   |             |             |             |
|---|-------------|-------------|-------------|
| C | -1.46904300 | 0.38447100  | -1.16096300 |
| H | -1.93702200 | 1.36635700  | -1.20384200 |
| H | -1.31583400 | 0.06367400  | -2.20394900 |
| C | -2.32903800 | -0.66230700 | -0.42381700 |
| C | -2.94197500 | -0.06751600 | 0.88184000  |
| H | -3.55724400 | -0.85480800 | 1.33699100  |
| H | -3.62941400 | 0.73815300  | 0.59598800  |
| C | -1.29099400 | -1.77339000 | -0.16462200 |
| H | -1.54134500 | -2.39740600 | 0.69915000  |
| C | -3.48568700 | -1.15363100 | -1.30903000 |
| H | -4.18741400 | -0.34424300 | -1.53732800 |
| H | -3.11456500 | -1.55675600 | -2.25728100 |
| H | -4.04857100 | -1.94702100 | -0.80701000 |
| H | -1.26006300 | -2.43958600 | -1.03466100 |
| C | -1.99290100 | 0.45036900  | 1.93292700  |
| C | -1.86374600 | 1.73804500  | 2.28658500  |
| H | -1.41489100 | -0.29427200 | 2.48183700  |
| H | -1.20456100 | 2.04414100  | 3.09417200  |
| H | -2.46136900 | 2.51954300  | 1.82114500  |

**TS<sub>NO</sub>**

|   |             |             |             |
|---|-------------|-------------|-------------|
| C | -3.49843200 | -0.56746500 | -1.50873400 |
| H | -4.15450600 | 0.30768200  | -1.56722600 |
| H | -3.07678200 | -0.73994300 | -2.50400100 |
| H | -4.11895300 | -1.43347700 | -1.25711600 |
| C | -2.37223900 | -0.36711400 | -0.47035300 |
| C | -1.38481500 | -1.55431300 | -0.48576200 |
| C | 0.03828900  | -1.03350800 | -0.16691500 |
| C | 1.12683100  | -1.88101000 | -0.89882900 |
| H | 0.85219800  | -2.93446500 | -0.77047100 |
| C | 2.41811800  | -1.49996500 | -0.23348400 |
| C | 2.96456800  | -0.35933300 | -0.67748600 |
| C | 3.42851700  | 0.73747600  | 0.21975000  |
| H | 3.49958600  | 0.40636900  | 1.25834700  |
| H | 4.38860300  | 1.19660200  | -0.04439400 |
| C | 2.35207600  | 1.84073400  | 0.06383700  |
| C | 0.85503500  | 1.63261400  | -0.25911300 |
| C | -1.46235600 | 0.80929700  | -0.88541800 |
| H | -1.39129300 | 0.82831200  | -1.98397900 |
| H | -1.86096300 | 1.77836500  | -0.58921200 |
| C | 2.76761000  | -2.19400800 | 1.05641200  |
| H | 3.60811300  | -1.72638900 | 1.57292900  |
| H | 1.92364100  | -2.25797000 | 1.75610200  |

|   |             |             |             |
|---|-------------|-------------|-------------|
| H | 3.06068500  | -3.22792500 | 0.83452000  |
| H | -1.67020400 | -2.35843000 | 0.19922200  |
| C | -3.10501600 | -0.17476000 | 0.88287100  |
| H | -3.87548700 | 0.61143600  | 0.80724400  |
| H | -3.67633300 | -1.07751300 | 1.13835200  |
| H | 2.68204000  | -0.02817500 | -1.67931100 |
| H | 1.12488000  | -1.66200300 | -1.97217000 |
| C | -0.03732700 | 0.52351900  | -0.39544500 |
| H | 0.08857500  | 1.06194000  | 0.75011500  |
| C | 0.24793600  | 3.01468300  | -0.52928700 |
| H | -0.61700400 | 3.22536300  | 0.10402400  |
| H | 0.98117200  | 3.79935000  | -0.34825400 |
| H | -0.07725100 | 3.08392000  | -1.57239500 |
| H | 2.64293600  | 2.44628600  | -0.80707200 |
| H | 2.38634800  | 2.54768900  | 0.90373700  |
| H | -1.38151000 | -1.98844300 | -1.49227600 |
| H | 0.21916400  | -1.15601900 | 0.90560400  |
| O | -1.30003900 | 0.55726100  | 2.11810300  |
| N | -2.45573000 | 0.18260900  | 2.16294100  |

**TS<sub>H</sub>**

|   |             |             |             |
|---|-------------|-------------|-------------|
| C | -3.96057300 | -0.22140200 | -0.66826600 |
| H | -4.55983300 | 0.64378400  | -0.36444100 |
| H | -3.82427300 | -0.17549200 | -1.75440600 |
| H | -4.54327300 | -1.12017900 | -0.44270700 |
| C | -2.61322200 | -0.25272700 | 0.06692600  |
| C | -1.70589200 | -1.39756700 | -0.41011800 |
| C | -0.25392500 | -1.00546000 | -0.05651100 |
| C | 0.77930600  | -1.80308100 | -0.90521500 |
| H | 0.48938700  | -2.85824400 | -0.84079600 |
| C | 2.11896900  | -1.49503500 | -0.30409900 |
| C | 2.67999900  | -0.35788700 | -0.73816800 |
| C | 3.25995800  | 0.67668100  | 0.16375500  |
| H | 3.41313000  | 0.29582800  | 1.17649900  |
| H | 4.20657600  | 1.12140200  | -0.16564600 |
| C | 2.21113600  | 1.81324500  | 0.15467600  |
| C | 0.68093100  | 1.66090400  | 0.03756600  |
| C | -1.74321300 | 0.96711400  | -0.29505000 |
| H | -1.81911900 | 1.16978400  | -1.37505500 |
| H | -2.06383100 | 1.87374100  | 0.21764600  |
| C | 2.53311700  | -2.26422200 | 0.92244200  |
| H | 3.42491600  | -1.85215500 | 1.39881500  |
| H | 1.73862400  | -2.33605400 | 1.67682500  |

|   |             |             |             |
|---|-------------|-------------|-------------|
| H | 2.77125700  | -3.29494200 | 0.63104700  |
| H | -1.96463000 | -2.36269000 | 0.03553100  |
| C | -2.85216200 | -0.31342400 | 1.58924500  |
| H | -3.44537100 | 0.54337500  | 1.92614400  |
| H | -1.92034200 | -0.31929700 | 2.16860900  |
| H | -3.40196400 | -1.22140600 | 1.85534600  |
| H | 2.33926800  | 0.03081700  | -1.70047500 |
| H | 0.71739900  | -1.50246600 | -1.95646000 |
| C | -0.27283800 | 0.58184600  | -0.05469000 |
| H | 0.07719500  | 0.98457300  | 1.09532100  |
| C | 0.08334100  | 3.06941200  | -0.02737000 |
| H | -0.64936100 | 3.25453200  | 0.76131800  |
| H | 0.86199200  | 3.82514700  | 0.06415400  |
| H | -0.42569100 | 3.20979800  | -0.98632300 |
| H | 2.39893200  | 2.41849000  | -0.74609500 |
| H | 2.38039100  | 2.51346900  | 0.98361100  |
| H | -1.79313900 | -1.50900300 | -1.49865200 |
| H | -0.07782600 | -1.28320500 | 0.98946000  |

**TS<sub>NMe2</sub>**

|   |             |             |             |
|---|-------------|-------------|-------------|
| C | -3.09230700 | -1.81803500 | -1.40423000 |
| H | -3.81371800 | -1.14665100 | -1.88216400 |
| H | -2.64681400 | -2.44399000 | -2.18400400 |
| H | -3.64942800 | -2.47504000 | -0.72817400 |
| C | -2.01260600 | -1.03913400 | -0.63728000 |
| C | -0.92421900 | -1.97323100 | -0.06239500 |
| C | 0.39654400  | -1.16205900 | 0.00153200  |
| C | 1.66075600  | -2.00414500 | -0.39756400 |
| H | 1.54053600  | -3.00269200 | 0.03647000  |
| C | 2.80504800  | -1.21491100 | 0.18224300  |
| C | 3.14318100  | -0.11554300 | -0.50745200 |
| C | 3.29583700  | 1.23340000  | 0.11273500  |
| H | 3.34199100  | 1.16367600  | 1.20182400  |
| H | 4.17262400  | 1.80447800  | -0.21472300 |
| C | 2.04344500  | 2.04249500  | -0.34106700 |
| C | 0.65845000  | 1.43975200  | -0.76918000 |
| C | -1.15220300 | -0.16342100 | -1.57862700 |
| H | -0.82458800 | -0.78053600 | -2.43459200 |
| H | -1.66433700 | 0.69988500  | -1.99609000 |
| C | 3.16793200  | -1.49415700 | 1.61717800  |
| H | 3.85816300  | -0.75495800 | 2.02819800  |
| H | 2.29320400  | -1.55812700 | 2.27906700  |
| H | 3.66690200  | -2.46974100 | 1.67504000  |

|   |             |             |             |
|---|-------------|-------------|-------------|
| H | -1.18597100 | -2.39673200 | 0.91160500  |
| C | -2.73238300 | -0.14918000 | 0.41353000  |
| H | -3.46628000 | 0.45240000  | -0.13358500 |
| H | -3.31025800 | -0.79863500 | 1.08854900  |
| H | 2.88767500  | -0.09599600 | -1.56956900 |
| H | 1.72477700  | -2.11730400 | -1.48554400 |
| C | 0.12234100  | 0.11318900  | -0.82912700 |
| H | -0.13677300 | 1.24696600  | 0.16009200  |
| C | -0.02271300 | 2.50764000  | -1.64980800 |
| H | -1.10967100 | 2.51193200  | -1.57644400 |
| H | 0.32368400  | 3.49963600  | -1.35556400 |
| H | 0.25090900  | 2.35988000  | -2.69991100 |
| H | 2.33596800  | 2.56551500  | -1.25851800 |
| H | 1.82579700  | 2.84050200  | 0.37868400  |
| H | -0.79165800 | -2.82008300 | -0.74532200 |
| H | 0.57372000  | -0.81940300 | 1.02558100  |
| N | -1.87987200 | 0.78415700  | 1.20021500  |
| C | -2.52886600 | 2.10220900  | 1.34632000  |
| H | -3.48624300 | 2.03809900  | 1.88698000  |
| H | -1.87015700 | 2.77527800  | 1.90283200  |
| H | -2.71898900 | 2.54215900  | 0.36389800  |
| C | -1.57549800 | 0.25233900  | 2.54207500  |
| H | -0.87971000 | 0.92157600  | 3.05633500  |
| H | -2.48331700 | 0.16062200  | 3.15955100  |
| H | -1.11537600 | -0.73505800 | 2.47469500  |

**TS<sub>Furan</sub>**

|   |             |             |             |
|---|-------------|-------------|-------------|
| C | -0.43093500 | -0.98724700 | -0.73481100 |
| H | -0.46297400 | -0.19076500 | -1.48334600 |
| C | -1.75902200 | -1.82693300 | -0.87823100 |
| H | -1.80681000 | -2.57741400 | -0.08059400 |
| H | -1.69454300 | -2.36079100 | -1.83284100 |
| C | -2.90176100 | -0.84894500 | -0.80562300 |
| C | -3.28932900 | -0.15956800 | -2.08861400 |
| H | -3.76179500 | -0.88875500 | -2.75873100 |
| H | -4.00525400 | 0.65053800  | -1.93494400 |
| H | -2.42571900 | 0.24126200  | -2.63617300 |
| C | -3.25624100 | -0.43637800 | 0.42456900  |
| H | -2.96953600 | -1.06879600 | 1.26632900  |
| C | -3.43435300 | 1.01975300  | 0.76770800  |
| H | -3.78463700 | 1.16947300  | 1.79290900  |
| H | -4.11447400 | 1.56675700  | 0.10980800  |
| C | -1.99136900 | 1.60709700  | 0.56824700  |
| H | -1.91282200 | 2.62427300  | 0.96758100  |

|   |             |             |             |
|---|-------------|-------------|-------------|
| H | -1.79576300 | 1.65070000  | -0.50538200 |
| C | -0.93915800 | 0.73275500  | 1.25948200  |
| C | -0.25993800 | -0.36369300 | 0.67222400  |
| H | 0.24640100  | 0.84747000  | 0.60435400  |
| C | -0.73000100 | 1.09421500  | 2.71140000  |
| H | -1.70636500 | 1.00938100  | 3.20337100  |
| H | -0.02895900 | 0.45835500  | 3.24664600  |
| H | -0.42471600 | 2.14071500  | 2.80760800  |
| C | 0.77693700  | -1.20530200 | 1.39607200  |
| H | 1.27372600  | -0.70348900 | 2.22775000  |
| H | 0.23913500  | -2.06960400 | 1.81284500  |
| C | 1.76162300  | -1.68586900 | 0.29928700  |
| C | 2.87784000  | -0.62279800 | 0.04344500  |
| H | 3.52504500  | -1.00226700 | -0.75640600 |
| H | 3.50079700  | -0.55684200 | 0.94243000  |
| C | 0.83019500  | -1.87634900 | -0.93016000 |
| H | 1.33931100  | -1.64356700 | -1.86855400 |
| C | 2.45125900  | -2.99782400 | 0.70420900  |
| H | 3.06566200  | -2.86789700 | 1.60177000  |
| H | 1.71630300  | -3.78325200 | 0.90876100  |
| H | 3.10644900  | -3.35565100 | -0.09658700 |
| H | 0.52140100  | -2.92530100 | -0.98724500 |
| C | 2.45828800  | 0.76941400  | -0.30330600 |
| C | 2.45795500  | 1.95423800  | 0.38872500  |
| O | 2.01675400  | 1.00096000  | -1.58408000 |
| C | 1.99031300  | 2.96917700  | -0.51508100 |
| H | 2.79999000  | 2.09504200  | 1.40528300  |
| C | 1.74254100  | 2.33681500  | -1.69594100 |
| H | 1.88672200  | 4.02677900  | -0.31872500 |
| H | 1.41032700  | 2.67061400  | -2.66687900 |

## 5. Free energy profiles calculated using the RODS algorithm.

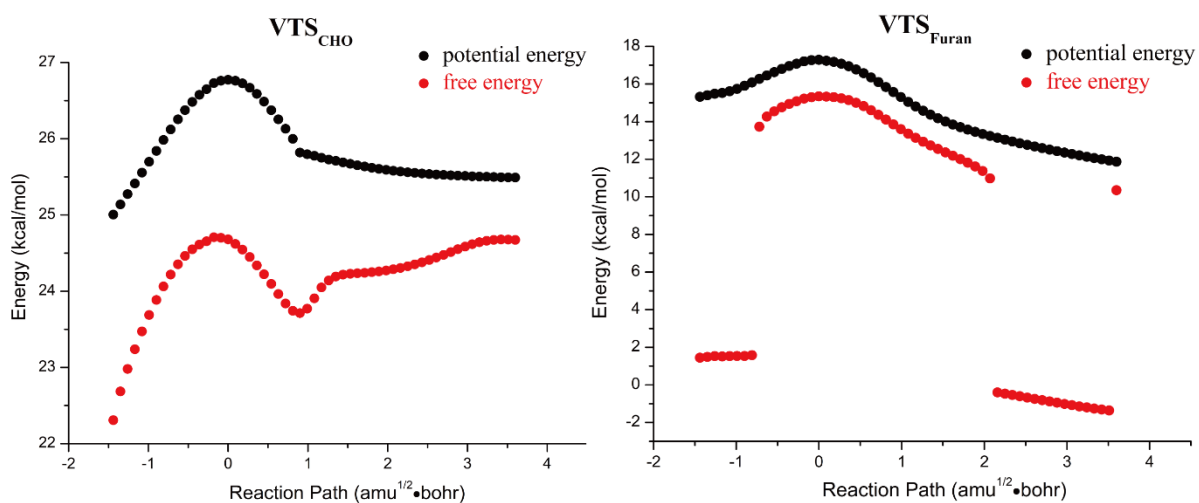

## 6. Tunneling results.

Table. Results of the Wigner tunneling correction (transmission coefficient) to the rate constant  $k$  for hydrogen migration in Figure 1.

| X           | TSS                              | TSS<br>barrier(kcal/<br>mol) | $k$ ( $s^{-1}$ )       | Wigner correction |
|-------------|----------------------------------|------------------------------|------------------------|-------------------|
| $N(CH_3)_2$ | <b>TS-<math>N(CH_3)_2</math></b> | 26.4                         | $2.34 \times 10^{-7}$  | 1.23              |
| $OCH_3$     | <b>TS-<math>OCH_3</math></b>     | 26.8                         | $1.40 \times 10^{-7}$  | 1.20              |
| H           | <b>TS-H</b>                      | 27.6                         | $3.32 \times 10^{-8}$  | 1.20              |
| $CF_3$      | <b>TS-<math>CF_3</math></b>      | 33.5                         | $1.68 \times 10^{-12}$ | 1.19              |
| CN          | <b>TS-CN</b>                     | 32.9                         | $4.40 \times 10^{-12}$ | 1.19              |
| $NO_2$      | <b>TS-<math>NO_2</math></b>      | 30.9                         | $1.21 \times 10^{-10}$ | 1.17              |

Tunneling calculations were performed with the KiSTheIP program<sup>1</sup> and Wigner method<sup>2</sup> is used to estimate the tunneling correction to the rate constant  $k$ . Reaction path degeneracy<sup>3</sup> is set to 1. We also considered the frequency scale factor<sup>4</sup> and estimate it to 0.98.

1. S. Canneaux, F. Bohr and E. Henon, *J. Comput. Chem.*, 2014, **35**, 82–93.
2. (a) N. L. Balazs and A. Voros, *Ann. Phys.*, 1990, **199**, 123-140. (b) B. C. Garrett and D. G. Truhlar, *J. Phys. Chem.*, 1979, **83**, 200-203.
3. A. Fernández-Ramos, B. A. Ellingson, R. Meana-Pañeda, J. M. C. Marques and D. G. Truhlar, *Theor. Chem. Acc.*, 2007, **118**, 813–826.
4. I. M. Alecu, J. Zheng, Y. Zhao, and D. G. Truhlar, *J. Chem. Theory Comput.* 2010, **6**, 2872–2887.
5. Examples with similar values of Wigner corrections: O. M. Ogba, J. D. Thoburn and D. J. O’Leary, Ch. 14 in *Applied Theoretical Organic Chemistry*, World Scientific, 2018.
